# Supplementary material for: Modification of the surface of Mn0.25Cd0.75S polyhedra with NiB: reducing the surface work function and promoting electron migration for enhanced photocatalytic hydrogen production
Source: Royal Society of Chemistry journal article supplement (doi:10.1039/d2nj03428j), 2022-01-01
Supplement: d2nj03428j1.pdf [file d2nj03428j1.pdf]

## Supplementary information

### **Modification the surface of $\text{Mn}_{0.25}\text{Cd}_{0.75}\text{S}$ polyhedra with NiB: reducing the surface work function and promoting electrons migration for enhanced photocatalytic hydrogen production**

Yuan-Yuan Qin,<sup>‡</sup> Shi-Yu Wang,<sup>‡</sup> Yu-Meng Wang, Feng-Yan Li\*, Lin Xu

Key Laboratory of Polyoxometalate and Reticular Material Chemistry of Ministry of Education, College of Chemistry, Northeast Normal University, Changchun 130024, P. R. China.

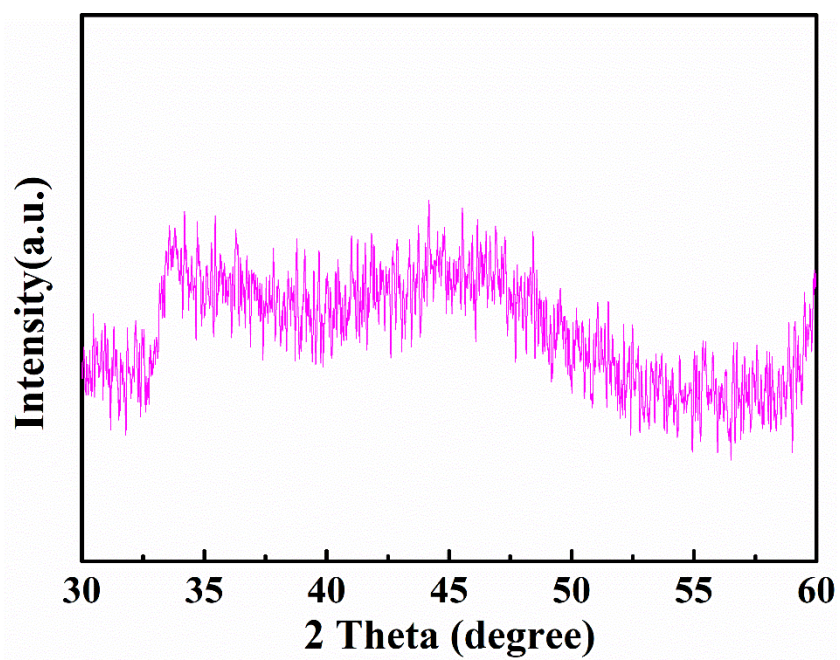

Fig.S1 XRD pattern of NiB.

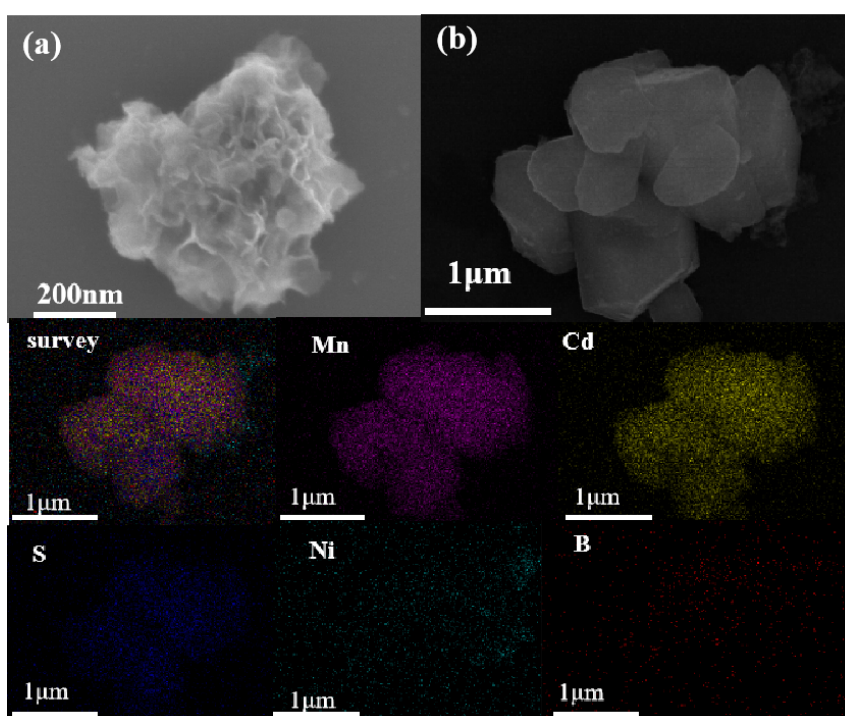

Fig. S2 (a) SEM of NiB; (b)SEM and SEM-mapping of 10%NiB/MCS.

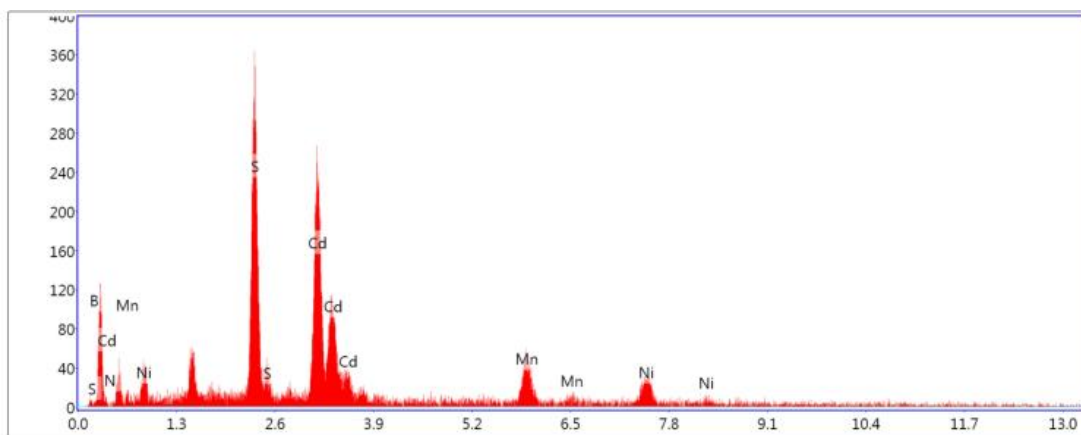

**Fig. S3** Energy-dispersive X-ray (EDX) spectrum of 10%NiB/MCS.

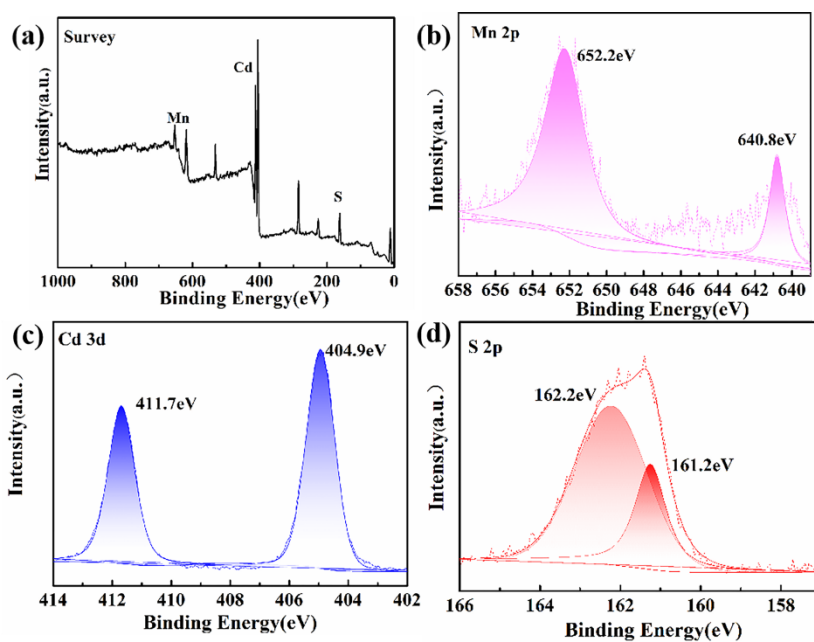

**Fig. S4** XPS Spectra of the 10%NiB/MCS (a) survey; (b) Mn 2p; (c) Cd 3d; (d) S 2p
